1

2 **From protection of sacrificial self to critical turning points and**  
3 **growth: Nurses' experiences on the frontline during the COVID-19**  
4 **pandemic.**

5

6 Sinéad Creedon<sup>1¶\*,#a</sup>, Anna Trace<sup>2&,#b</sup>

7

8 <sup>1</sup>School of Public Health, University College Cork, Cork, Ireland

9

10 <sup>2</sup>School of Applied Psychology, University College Cork, Cork, Ireland

11

12 <sup>#a</sup>Current Address: School of Public Health, Western Gateway Building, University  
13 College Cork, Cork, Ireland

14

15 <sup>#b</sup>Current Address: School of Applied Psychology, Cork Enterprise Centre, North Mall  
16 Campus, University College Cork, Cork, Ireland

17

18

19 \*Corresponding author

20 E-mail: [screedon@ucc.ie](mailto:screedon@ucc.ie) (SC)

21 **Conceptualization:** Sinéad Creedon

22 **Data curation:** Sinéad Creedon

23 **Formal analysis:** Sinéad Creedon

24 **Investigation:** Sinéad Creedon

25 **Methodology:** Sinéad Creedon

26 **Project administration:** Sinéad Creedon

27 **Supervision:** Anna Trace

28 **Validation:** Sinéad Creedon, Anna Trace

29 **Writing – original draft:** Sinéad Creedon

30 **Writing – review & editing:** Sinéad Creedon, Anna Trace

31

NOTE: This preprint reports new research that has not been certified by peer review and should not be used to guide clinical practice.

## 32 Abstract

33 The mental health and wellbeing of nurses has been a concern, long before the arrival of  
34 the COVID-19 pandemic. Working on the frontline under such challenging  
35 circumstances, for extended periods of time, has resulted in negative psychological  
36 responses. The current study aims to examine nurses' resilience in acute hospitals in  
37 Ireland, during a period of adversity (pandemic), to explore it's impact on their personal  
38 and professional identity, and their perception of meaningful supports and coping. An  
39 interpretative phenomenological analysis was carried out to gain insight into how nurses  
40 adapted to the changing work environment during the pandemic. Online semi-structured  
41 interviews were carried out with six experienced female nurses, who were redeployed to  
42 the frontline from their own roles. Three experiential themes representing the nurses'  
43 journey were generated: Protection of Sacrificial Self; The Fortifying Effect of Us, and  
44 Critical Turning Points & Growth. Nurses made significant sacrifices and had to find  
45 ways to detach to cope. They revitalized themselves by creating a sense of 'us' to help  
46 them face a harsh climate against others, which enabled critical turning points and  
47 growth. This study has strongly highlighted the emotional effects on nurses due to feeling  
48 isolated, undervalued, and excluded during redeployment to the frontline. It has also  
49 featured how well nurses coped while faced with an existential crisis and has given voice  
50 to all nurses who faced this pandemic despite exposure to risk of burnout and threats to  
51 their mental health and wellbeing. This study has further enriched our understanding of  
52 personal growth and trauma in adverse work conditions by including an exploration of  
53 what sacrificial commitment adds to our understanding of physical and moral courage.  
54 Future provision of supports for nurses must be ongoing both during and after crisis  
55 events.

56  
57 **Keywords:** crisis, interpretative phenomenological analysis, nurses, positive psychology,  
58 psychological support, resilience, sacrificial commitment.

59

## 60 Introduction

61 Long before the COVID-19 pandemic, the mental health and wellbeing of  
62 nurses has been a concern, and they were already overstretched, due to the nature of  
63 their work, and also due to austerity measures during the last financial crash [1, 2].  
64 During the pandemic, and again, as a result of the 2021 cyber-attacks on the Health

65 Service Executive (HSE) in Ireland, nurses once again found themselves facing severe  
66 adverse events. This has resulted in nurses, and other healthcare workers experiencing  
67 significant change and adaptation while navigating the post-pandemic landscape.

68 Younger nurses aged between 18 and 35 years, who were married or in  
69 relationships, with dependent children, were amongst the most exposed of all healthcare  
70 workers [3, 4]. Older nurses, the majority also female, suffered considerable health  
71 impacts [5]. Interestingly, a recent systematic review suggests that almost 32% of  
72 nurses intended to leave the profession during the COVID-19 pandemic [6].

73 Redeployed nurses were “the hardest hit” [7]. Their workloads scaled up  
74 significantly both at work and at home. Women, but particularly nurses, were expected  
75 to prop up our healthcare system while also largely holding down the family home. This  
76 caused them much distress, overwhelm, and at its extreme, burnout, and even suicide  
77 [8], but some also faced these challenges with resilience and courage.

78 Nurse ‘redeployment’ during the pandemic was when nurses were assigned  
79 without choice, from their own specialist clinical settings to alternate and often  
80 unfamiliar COVID units [9]. As a result, they felt forced into highly complex situations  
81 where they had to rapidly flex and adjust, due to unprecedented disruption to their  
82 working lives, resulting in them experiencing poorer physical and mental health  
83 outcomes [10]. It is important to note that not all nurses were redeployed, and those  
84 nurses got to carry as normal in their own clinical settings without any major disruption.

85 Women make up more than 85% of the global nursing workforce [11], and it is  
86 well documented that the pandemic exacerbated gender inequalities in women, which  
87 has introduced brand new challenges that are unprecedented to society at large [12].  
88 According to the Women in Global Health Report 2023 [13], ‘ingrained inequalities and  
89 asymmetrical power relations, gendered organizational structures and norms’ are at play

90 to shape the experiences of healthcare workers. The Nursing and Midwifery Board of  
91 Ireland (NMBI) published data on the State of the Register 2023 [14] reporting that 90  
92 % (71,456) of all nurses and midwives registered in Ireland were female.

93 As a result of the profound effect on a majority female workforce, this study  
94 aimed to examine female nurses' resilience in acute hospitals in Ireland, during a period  
95 of adversity (COVID-19 pandemic), to explore it's impact on their personal and  
96 professional identity, and their perception of meaningful supports to cope.

## 97 **Sacrifice & Emotional Response**

98 One of the key burdens facing frontline nurses was the higher risk of contracting  
99 disease which contributed to their feelings of fear of being infected, or by infecting  
100 others, including their family members or friends which affected their emotional,  
101 psychological & physical wellbeing and their capacity to do their job [15, 16].

102 Another key burden that nurses faced was the existential threat of death and  
103 dying, which created a heightened state of alertness and resulted in sustained levels of  
104 hypervigilance [17, 18]. Because this extra burden caused so much distress and threat to  
105 nurses, they relied on potent war metaphors to help portray their trauma [18]. War  
106 metaphor themes coming from some of the research included 'hard armour', 'temporary  
107 concentration camps', and where nurses reported having 'won this battle' [18, 20].

108 A further pressure experienced by the nurses was how the public portrayed them  
109 as heroes. This hero label placed too much emphasis to perform at such a high standard  
110 that a common trend among nurses, and other healthcare workers (HCWs), was to push  
111 the hero label away to protect themselves professionally [21].

112 Despite being redeployed to the frontline without choice, the nurses' profound  
113 sense of duty and professional responsibility enabled them to stay, commit and sacrifice  
114 themselves in a harsh climate, flanked by their peers [19]. Furthermore, the literature

115 suggests that the exposure to morally injurious events has been one of the most  
116 prominent factors for nurses during this pandemic [22].

## 117 **Experience of and adaptation to adversity (resilience)**

118 In facing this fear, and emotional turmoil, nurses found meaning and purpose in  
119 their new roles, resulting in increased levels of self-efficacy, thus learning to adapt well  
120 in the face of adversity [23]. Furthermore, emotional toughness, personal character  
121 strengths, and being able to detach, have all been identified as strategies used by nurses  
122 to build feelings of hope and self-efficacy, thus increasing resilience [24]. During the  
123 pandemic, resilience played a protective role where positive factors such as tenacity,  
124 strength, and optimism, were observed [24]. On the other hand, what has been shown to  
125 reduce nurses' resilience is work conflict, poor organisational and social supports,  
126 feeling undervalued at work, exhaustion, moral injury, defective preparedness, poor  
127 communication, and constantly changing guidelines [15].

## 128 **Post Traumatic Growth**

129 Nurses can experience post traumatic growth after traumatic events, and this  
130 higher level of functioning can coexist with the ongoing distress experienced during  
131 traumatic events [25]. For frontline workers and nurses, those with higher levels of  
132 perceived solidarity with social groups, were found to have a stronger sense of purpose  
133 and meaning in life, and pride in their work, resulting in growth [8], Because nurses are  
134 perceived to be caring and compassionate, practicing those virtues and knowing their  
135 own personal characteristics and strengths can help bring some meaning to their  
136 adversity as well as to build hope and self-efficacy to bring them some work life  
137 balance [20].

## 138 **Supports**

139           Nurses coping mechanisms and social supports have been shown to strengthen  
140 their resilience when faced with adversity and crisis. Apart from Maslow’s fundamental  
141 hierarchy of needs, both intrinsic and extrinsic factors play a role in how nurses support  
142 themselves [26]. The importance of self-care has been shown to impact positively on all  
143 healthcare workers during the pandemic [15, 27]. Also, detaching from social media,  
144 news, and government briefings was a protective coping mechanism for nurses [21].  
145 Nurses also relied on other self-coping mechanisms such as introspection, engaging  
146 with nature and virtues (practicing gratitude and having hope and wisdom) to get them  
147 through the crisis thus making them more resilient [28]. Notably, at times of severe  
148 adversity, some studies found a strong link between spirituality and improved health,  
149 such as the ability to forgive oneself [29].

150           Although in general, supports had a positive effect, there were certain times  
151 when supports were less helpful. For example, although nurses were brought closer by  
152 their shared experience, there were also times that relationships with their peers were  
153 strained, especially where workloads were reported to be unequal and where there was  
154 workplace incivility [27]. Another example was where nurses reported feeling touched  
155 at the acknowledgement and generosity from the public during the pandemic, which  
156 initially boosted morale and confidence, however, they described this relationship as a  
157 ‘double edged sword’ where most felt it was short-lived once the clapping and support  
158 from the public had waned [15, 16, 27]. Also, nurses who sought support from family,  
159 found that they were not able to relay to them what they were going through, and  
160 although they were ‘in the same boat’, or ‘in it together’, this did not resemble the  
161 collegiality and support they felt with other nurses [30].

162 Frontline clinical nurse managers also provided support to nurses, and other  
163 healthcare workers, both during and since the pandemic, in the form of workplace  
164 interventions. Some workplace interventions focused on having psychologically savvy,  
165 ‘on the ground’ clinical nurse managers who were adequately equipped and trained to  
166 support nurses in crisis [31]. Other studies that focus on nurses and other healthcare  
167 workers, indicate that experienced leaders need to have early detection strategies, to  
168 support and address any mental health risks. For example, Greenberg and colleagues  
169 recommend that managers need to: be empathic and listen out for staff that may be at  
170 risk; only offer low level psychological interventions early, followed by a clear pathway  
171 for staff to access professional help, such as trauma risk management and peer support  
172 if required [32].

173 Nurse leadership during the COVID-19 pandemic was reported to have been  
174 more meaningful where leaders were actually present, where they showed vulnerability  
175 and where they stepped up to acknowledge challenges, even if they didn’t have all the  
176 solutions [33]. In stark contrast to that, a UK study identified how little presence there  
177 was of senior nurse leaders on the frontline in the UK during the pandemic; they tended  
178 to focus more on policy and procedure over the power of compassionate leadership and  
179 emotional support for staff [23]. This further highlighted the importance of a visible  
180 presence of senior nurse leaders on the frontline, who prioritised ‘shared models of  
181 engagement [23].

182 Formal supports for nurses can also include evidence-based strategies or  
183 interventions. Clinical debriefing sessions provide a psychologically safe space for  
184 nurses and their co-workers to share their thoughts and experiences and to process  
185 emotion, enhance mental health, and enable them to appreciate each other’s  
186 contributions. However, it is now well accepted that debriefing should not take place

187 during crisis events, not that it doesn't work but that it can cause harm. Instead  
188 'psychological PPE' (not debriefing) is recommended during a crisis event at work,  
189 where nurse leaders adopt a 'nipping it in the bud' approach, providing nurses with a  
190 focus on early 'return to duty' where at risk nurses are actively monitored in a 'watch  
191 and wait approach [34].

192 It is important to highlight that despite the HSE's significant investment in  
193 mentoring and coaching, there was no formal attempt to roll out supports through these  
194 existing services, either during or after the pandemic. This may have been beneficial in  
195 helping HCWs to heal, while also engaging in post-traumatic growth and adaptation.  
196 Positive psychology, the fastest-growing discipline in applied psychology, is closely  
197 associated with post-traumatic growth, and is gaining considerable traction in healthcare  
198 worker wellbeing research [35]. A recent systematic review strongly indicated that  
199 positive psychology interventions (PPIs) show promise for improving the wellbeing of  
200 healthcare workers in crisis, albeit with more focus being placed on organisational-led  
201 as opposed to individual-led interventions [36].

202 Some qualitative studies have given insight into frontline healthcare workers'  
203 experiences in the early stages of the pandemic. An interpretative phenomenological  
204 analysis (IPA) study explored UK healthcare practitioners personal experience and  
205 contextual factors and how they influenced their wellbeing in the early stages of the  
206 pandemic [16]. Whereas in another phenomenological study, the researcher gave insight  
207 into how doctors and nurses, working in China during the pandemic, ended up taking a  
208 lot of responsibility, thus explored their resilience, and the challenges they faced at  
209 work [20]. Some qualitative research from other countries, including the USA [33], also  
210 focused specifically on nurses' experience of caring for their patients during the  
211 pandemic. However, understanding and insight is needed into Irish nurse's experience,



212 especially their resilience during adversity, that of the pandemic, and what was  
213 supportive for them. This is particularly important given how stretched Irish healthcare  
214 workers have been for so long, due to austerity, attrition rates, and the recent pandemic.

## 215 **Materials and methods**

### 216 **Aims**

217 The aim of this study was to examine nurses' resilience in acute hospitals in Ireland,  
218 during a period of adversity (pandemic); to explore it's impact on their personal and  
219 professional identity, and their perception of meaningful supports and coping.

### 220 **Design**

221 This is a qualitative IPA study exploring the thoughts, feelings, and perceptions  
222 of the nurse participants. The researcher drew upon IPA to explore a more existentially  
223 informed study. The two key principles of phenomenological psychology fit well with  
224 this research study as it focuses on intentionality, or 'what' is being experienced, and  
225 how one's biases add further constructs of meaning to the experience. Hermeneutics is  
226 the art of interpretation, and the second theoretical foundation of IPA where the  
227 researcher attempts to step into the shoes of the participants, though that may never be  
228 completely possible [37]. The third theoretical foundation, idiography, is the in-depth  
229 analysis of individual participants, and the examination of their perspectives in their  
230 own unique contexts [37] researcher actively engaged with the transcripts in analysing  
231 what the participants were saying, but also at how they were saying it, allowing the  
232 researcher to read between the lines thus developing a thorough understanding of the  
233 personal experiences of each participant.

## 234 **Study participants**

235           Six (n = 6) female nurses between the ages of 21 and 65 took part in this study,  
236 the author's master's dissertation. All participants were redeployed from their existing  
237 roles to COVID wards in acute Irish hospitals, during the pandemic, from two provinces  
238 in Ireland. The nurses were recruited, under very difficult clinical circumstances, via  
239 convenience and snowball strategies, which represented a homogeneous sample of  
240 participants in keeping with the theoretical pillars of IPA [38]. When it comes to IPA,  
241 Reid and colleagues suggests that 'less is more' in its commitment to ideography, and  
242 that the examination of fewer participants in greater depth is far more valuable than the  
243 simple descriptive analysis commonly seen in grounded theory, thematic analysis, or  
244 indeed in weak IPA studies [39]. Smith and colleagues report that sample size depends  
245 on study context and that each study should be considered on a case-by-case basis. They  
246 suggest that between three and six participants for master's level is sufficient [40].  
247 Only female nurses who were redeployed to COVID units were included in the study.  
248 The rationale for this was that female nurses who were redeployed to COVID units, and  
249 who had significant caring commitments at home, were at greater risk of psychological  
250 distress and harm [41]. Consequently, male nurses and student nurses were excluded  
251 from the study. Nurses who were not redeployed or who did not work on COVID units  
252 were also excluded.

## 253 **Data collection**

254           Recruitment for the study commenced on 8<sup>th</sup> February 2021 and ended on 1st  
255 March 2021. Written communication took place via the researcher's university email  
256 credentials and verbal correspondence took place via the researchers Microsoft Teams  
257 account. Following initial email contact, a short Microsoft Teams call took place to  
258 provide a brief outline of the study, obtain verbal agreement, form initial rapport, and

259 address any queries. Participants also received information on the purpose and nature of  
260 the study, the aims and methodology, and information about the researcher. Following  
261 the calls, each participant was emailed a copy of the study information sheet and  
262 consent form as well as a copy of the interview schedule. Signed consent forms were  
263 returned to the researcher by email and stored securely on OneDrive, the university's  
264 secure server. The interviews took place between 15<sup>th</sup> March and 1<sup>st</sup> May 2021, during  
265 the latter end of the third wave of the pandemic. Participants were briefed again at the  
266 start of each interview on the reasons for doing the research, and that the information  
267 they provided during the study would be kept confidential, and that they reserved the  
268 right to withdraw from the study. The first author carried out the virtual semi structured  
269 interviews, lasting between 60 and 90 minutes (mean length = 75), using Microsoft  
270 Teams, due to lockdown protocols, and to protect the nurses. The recordings were split  
271 using Panopto software, video recordings deleted, and audio recordings were uploaded  
272 to OneDrive for short term storage to facilitate transcribing. Interview notes were also  
273 stored securely on OneDrive. Once transcribing in Microsoft Word had concluded,  
274 transcripts were forwarded to UCC via edugate's authenticated Filesender services for  
275 long term storage on an encrypted hard drive, and all associated OneDrive files were  
276 subsequently deleted. Microsoft Excel was used at the analysis stage and for table  
277 formatting. The interview schedule followed a topic guide consisting of four main  
278 domains; experience of and adaptation to adversity; self & identity, supports, and  
279 checking in and debriefing. Semi-structured interviewing was chosen as it allowed a  
280 purposeful conversation; beginning with general questions, moving to more personal  
281 questions once rapport was established. It also highlighted the subjective experiences  
282 of the participants, while also taking into consideration the use of language, cultural  
283 norms, and social aspects of the data [42].

## 284 **Ethical considerations**

285 Ethical approval (application MCP 812202005) was obtained on 16th December  
286 2020, from the School of Applied Psychology Research Ethics Committee (APREC), at  
287 University College Cork (UCC). Participants were informed prior to the interviews, the  
288 reasons for doing the research, and that the information they provided during the study  
289 would be kept confidential, and that they reserved the right to withdraw from the study.  
290 They were informed that their names would be removed by being assigned numerical  
291 codes during the transcription and coding process, and by using pseudonyms during  
292 data analysis. The researcher also checked what supports participants had access to, and  
293 provided additional support where required, and given the stressful nature of the  
294 participants' work, the researcher checked in with participants at the start and end of  
295 each interview.

## 296 **Data analysis**

297 Interviews were transcribed verbatim by the main researcher (SC), and analysis  
298 took place by drawing upon the seven steps of IPA [40], to explore a more existentially  
299 informed study. The aim was to generate, categorize and organise potential themes from  
300 the data by reading and re-reading transcripts and listening to the audio recordings,  
301 where the researchers stepped inside the world of nurses working on COVID wards, to  
302 try and understand how they experienced it, and to examine how they made sense of it,  
303 as meaningful insights were crucial to the understanding, perspectives, and common  
304 experiences of each nurse [40]. Any queries from the findings were directed to the  
305 participants for clarification. Transcripts were analysed individually and were annotated  
306 by colour-coding and note taking to try and identify potential codes and themes  
307 described as descriptive, linguistic or conceptual concepts. The next step required the  
308 researcher to identify and label the emerging themes from the transcripts which

309 represented the nature, quality and meaning of the nurses' experiences, including  
310 themes such as 'intense fear' and 'potent use of metaphors.' Coding was cross checked  
311 for errors and omissions with the second researcher (AT) who was also the author's  
312 dissertation supervisor. The final steps involved an attempt to introduce structure where  
313 the researcher listed themes, and formed clusters with shared meanings and references,  
314 and others that were characterized by hierarchical relationships with each another. The  
315 researcher moved back and forth between themes and original text where some changes  
316 to codes were made in this process. The final step involved producing a summary table  
317 with quotations

318

## 319 **Role of the researcher and study rigour**

320 One of the researchers (SC) was a senior frontline nurse working in a critical  
321 COVID-19 role in the acute hospital setting. Because at times, she felt emotionally  
322 involved, and understood what her colleagues were going through, she maintained a  
323 journal and checked in with her supervisor AT, as a strategy for maintaining reflexivity,  
324 keeping track of reasoning, judgment, bias, and emotional reactions [43]. It should be  
325 noted that SC was analysing the "familiar" rather than the "unknown" and an advantage  
326 here was that she had an inherent feeling of what the participants were going through,  
327 and at times could recognise, and have the coaching competence to refer participants for  
328 external supports where required. The researcher SC implemented certain strategies to  
329 ensure quality, credibility, and trustworthiness during data collection and analysis which  
330 included an experienced researcher AT providing oversight and feedback on the  
331 interview protocol, analysis process and themes. Regarding transferability, within the  
332 write-up, the researcher SC provided adequate information for readers to evaluate

333 relevancy, whilst also evoking a sense of shared experience. Further details can be  
334 viewed in supporting information.

## 335 **Results**

336           Between March and May 2021, the first author interviewed six (n = 6)  
337 experienced nurse participants between the ages of 21 and 65 years. Five (n = 5) were  
338 Irish nurses and one (n = 1) was from outside Ireland but was working in Ireland for  
339 most of her nursing career. One participant was approaching retirement. Participant  
340 characteristics are summarised in Table 1. Three experiential themes were found in this  
341 study that illustrated the nurses journey from firstly needing to find ways to protect  
342 themselves from the sacrifices on the frontline, to then moving to fortify themselves as a  
343 collective, and finally through experiencing critical turning points and growth. A  
344 summary of superordinate, subordinate, sub-themes & quotations on nurses'  
345 experiences on the frontline during the COVID-19 pandemic are listed in Table 2 and  
346 are further illustrated in the thematic mapping below (Fig 1).

### 347 **Table 1. Participant characteristics**

348 (Insert Table 1 here)

### 349 **Table 2. Summary table superordinate, subordinate and sub-themes &** 350 **quotations**

351 (Insert Table 1 here)

### 352 **Fig 1. Thematic map illustrating three major themes and subtheme**

353 (Insert Fig 1 here)

## 354 **Protection of Sacrificial Self**

355           Nurses found a need to protect themselves emotionally and mentally from the  
356 intense psychological overwhelm they experienced, which was triggered by the  
357 sacrifices they made on the frontline.

358

359           The emotional intensity arose from the nurses coming face-to-face with an  
360 existential threat, and the moral distress they experienced by being deployed to an  
361 unknown territory. Their fear was potent, especially the fear of infection and a fear of  
362 death and dying, for themselves, but also for their loved ones and patients.

363

364           Well, you walk into a ward, you might not have been in there for three hours,  
365 you don't know what you're going to get ... there are bodies going out every  
366 single day. There are just all these people crowding in. It's like "Mash" ...  
367 coming in on trollies, barely able to breathe, frightened, anxious. I mean, it was  
368 a war zone (Una)

369

370           Although they were redeployed to the frontline, the nurses showed a strong  
371 willingness to turn up and serve every day. This stemmed from a moral duty where their  
372 values got called into question in situations where they felt dangerously ill-equipped to  
373 cope.

374

375           I wasn't fighting the fact that I needed to go in and do this... I knew it was the  
376 right thing to do, so there was no doubt in my mind even if I got COVID. (Una)

377

378           Concerns about the nursing care deficits, meant that some even volunteered  
379 extra time with their patients to address this:

380

381           I sat with quite a lot of patients ... so they wouldn't be on their own, which  
382 I wouldn't have done before, but I made an effort ... I'd stay on after shift... and  
383 just give them that little bit extra attention and care, just because they weren't  
384 going to get it, when, when they did die (Emma)

385

386           Claire portrayed a compassionate picture of how devastating it was for her, not  
387 to be able to provide dignified care at end-of-life. She suffered extreme guilt and despair  
388 at being forced to pack her patients' bodies into cadaver bags in their hospital gowns,  
389 which deeply wounded her, as it went against her core values:

390

391           I don't want people to go in double black bags ... I feel like the dignity of the  
392 person at the time of their death, or even after they died, I'm not a grocery  
393 material to go in a plastic bag ... I don't want to pack anymore bodies; I don't  
394 want to do that (Claire)

395

396           All the nurses felt betrayed and lonely where they were left to face high risk and  
397 ethical dilemmas. Three of the nurses, in more critical frontline roles, felt forced into  
398 choosing which patients to save over others, and this came with huge emotional cost. "I  
399 took on everything, and if someone was deteriorating, it was because I wasn't doing a  
400 good enough job or if I had missed something...I felt like it would have been my fault"  
401 (Emma)

402



403           The nurses identified ways of protecting themselves emotionally to help  
404 maintain their focus at work. Some put their own emotions on hold whereas others just  
405 about ‘held it together,’ and all thought they would fall apart if they began processing  
406 their feelings too soon:

407

408           I can't let myself fully process the past year, because I don't know if  
409 I'm gonna fall apart or not, ... am I gonna hate my job and never want to go  
410 back...if we start kind of questioning ourselves, am I OK to do this (Trish)

411

412           Another protective mechanism was that most of them purposely detached from  
413 their chaotic surroundings. Ruth recalled how vital it was for her to “get off the merry-  
414 go-round” to recharge before getting back on. Three of the nurses detached by mentally  
415 hunkering down to unshackle themselves from the enormous mental strain. Once  
416 hunkered down, they entered into a purposeful flow state, with a heightened focus on  
417 critical tasks. This induced flow-state was protective in nature as it helped them to focus  
418 on the present moment, shelve their distractions, which helped sustain their energy  
419 levels:

420

421           My mantra was “one day at a time, one task at a time” and the only way I could  
422 get through my day, and if I lifted my head up to think of all the things that I had  
423 to do and all the responsibilities I had, I would have panicked and not being able  
424 to do anything, so I had to just break it down. “I'm here, I have to do this, no one  
425 else is going to do this, I have to just go in and do my best, there is nobody else”  
426 So, you need to just concentrate and try and get through the simple tasks that

427           you're doing and then you go on to the next task and ... my main aim was not to  
428           kill anybody (Una)

429

430           Another way they protected themselves was by the potent use of metaphors  
431           which helped them to make sense of the complex situations they found themselves in.  
432           Quite often they likened traumatic events to war where they endured “the scars” of  
433           battle by “working in the field.” Trish gives us a sense of how courageous and fearless  
434           she felt going into battle with “all guns blazing” flanked by her peers.

### 435    **The Fortifying Effect of Us**

436           As a result of feeling isolated, unsupported, and left out in an unrelenting  
437           climate for far too long, the nurses turned to each other and began to develop a strong  
438           solidarity or “us”, which helped them to bolster each other and build self-esteem against  
439           a growing perception of “them and us”.

440

441           Frontline nurses were left feeling unsupported by a public who once portrayed  
442           them as heroes, but now blamed them for spreading infection in hospitals. They also felt  
443           more isolated as they were the ones left holding the burden of responsibility, while  
444           others flouted guidelines or were spreading hate speech and vaccine misinformation on  
445           social media. This frustrated and angered Claire who wanted others to witness what was  
446           really happening behind hospital doors:

447

448           Am I allowed to say that I would love to go slap people who say there is no such  
449           thing as COVID? ... because they haven't seen what we have seen in that place,  
450           they were not there holding the hands of a person that was dying (Claire)

451

452 As a result of feeling isolated, all the nurses, over time, lost trust, and confidence  
453 in how the public supported them, and what began to emerge was a growing divide  
454 between “us”, the nurses, and “them”, the general public and media. This was further  
455 compounded by feelings of abandonment at work, because they were excluded from key  
456 decision-making, and were not being adequately supported. Trish described how the  
457 lack of presence of meaningful leadership and supports, led to feelings of extreme hurt  
458 and loneliness, “to even see a face . . . , would have meant a lot to us...one visit ... to the  
459 unit ... it really made us feel aware of where we are in the pecking order” (Trish)

460 The nurses felt even more isolated as they perceived their redeployment as  
461 unfair, and resented being called to the frontline over and over again by senior  
462 management, when compared with other nursing colleagues who were never once  
463 redeployed.

464  
465 I think a lot of us just felt like it was a kick in the teeth...we really just felt like a  
466 number...you know, redeployment was part of the gig, so “what do they have to  
467 complain about?” so yeah, it was just disheartening (Emma)

468  
469 The workload disparity and constant presence on the front line, was emotionally  
470 draining, placing an even bigger wedge between “us” the nurses, and “them”, other  
471 healthcare professionals.

472  
473 It's more difficult because we're with the patient all day, I mean the rest of them  
474 will do their treatment and ... go, the doctor will come in and do their treatment  
475 and go, the dietitian will come in and do her treatment and go, you know? So,  
476 we were the ones that were there all the time, yes, the constancy of it (Denise)

477

478           In addition, the nurses were unable to lean fully on family and friends for  
479 support because they felt that they couldn't possibly have understood what they were  
480 going through. Although they weathered the same storm, they were not all in the same  
481 boat as the nurses. Nevertheless, both Una and Emma at times, felt their partners were  
482 "key" to getting them through emotionally:

483

484           My poor boyfriend then got it all ... if I was quiet or upset ... he knew when to  
485 push and pull back with things, which was great (Emma)

486

487           At a certain point, things got so gruelling for the nurses that they began to  
488 question why they ever chose nursing as a career. Denise, who felt disrespected and  
489 undervalued, said, "I don't love nursing as much as I used to, and I would like ... to  
490 maybe leave and pursue something else ... I don't feel that my service was  
491 valued" (Denise)

492

493           What began to emerge for the nurses was a sense of power in numbers and  
494 solidarity. This is how they supported and bolstered themselves in a harsh climate, and  
495 began to build strength and confidence, feeling stronger against "them", and stronger  
496 against the world:

497

498           But from the lessons learned, I would (pause)... look after myself and look after  
499 my colleagues, that's all I can do ... because that was one thing that was poorly  
500 done, nobody ever had come back to us even asking us how we felt (Claire)

501

502           The sense of “us” gave hope at a time when commitment was needed. Claire  
503 described how the strong bonds she had developed with her colleagues served as a  
504 lifeline to her when she needed support most, “We kind of like poured our hearts out  
505 and we were able to...vent our feelings with each other, to share our emotions” (Claire)  
506

507           This solidarity delivered a huge amount of renewed self-assurance which helped  
508 protect and re-establish their self-esteem. Furthermore, the nurses also began to feel the  
509 positive relational effects of bonding together, “you're just tighter with your colleagues  
510 because you had to get through this together” (Una)

511

512           At times, some of the frontline clinical nurse managers (CNM) also became a  
513 part of us:

514

515           He was just one of those grounding people that if you saw him being calm and  
516 collected, you knew you could be as well...He knew our abilities, he knew what  
517 we could and couldn't do, he knew when to check in on us ... he was a great  
518 voice for us (Emma)

519

520           Another CNM provided a positive road map forward which helped build  
521 inspiration and enthusiasm within the nursing team.

522

523           The CNM came up with an idea called the positivity board ... It brought smiles  
524 to our faces, and I remember one of them writing “thank God the numbers are  
525 coming down”, or ... “I did not have to put anyone into a black bag today”  
526 (Clare)

527

528 Tributes at work were a stark reminder of how far the nurses had come and how  
529 lucky they felt to come through it:

530

531 There ... were pictures of us, socially distanced together; so those pictures went  
532 up on the positivity board, something to look back and say “OK, fine we have survived  
533 this (Claire)

534

535 All the nurses felt a conjoined sense of meaning and purpose with their nursing  
536 colleagues around the world which gave them immense strength:

537

538 I think there's some kind of comfort there as well to know that it's happened all  
539 around the world and ... most nurses have gone through it all together, so there  
540 is some kind of unity yeah, and like solidarity (Emma)

## 541 **Critical Turning Points and Growth**

542 Being away from the frontline allowed them to look back and accept their  
543 feelings of fear, anger and overwhelm:

544

545 So, anger was the first thing, like there was no reason to be angry with everyone,  
546 I was angry within myself ... I wasn't able to get on top of doing my things,  
547 which I would have normally done on a day-to-day basis looking after my  
548 patients (Claire)

549

550 Engaging in positive self-talk was another turning point. Positive self-talk  
551 enabled them to feel less of a victim, reaffirm their contributions and to feel more in

552 control, “I just had to talk to myself and tell myself I could do it and just get on with it  
553 and stay calm and stay focused” (Una)

554

555 Feeling better able to cope was another turning point. Claire felt if there was  
556 another COVID surge, she would be willing and happy to do it all again, having earlier  
557 felt she could never go through it again, “I don't want another wave coming, but if it  
558 does come to it, I would be willingly and happy going there” (Claire)

559

560 Another critical turning point was the ability to visualise to feel hopeful. For  
561 example, Denise, was reminded in her own drawings that all waves eventually diminish,  
562 and that the safety of her lifejacket would carry her through:

563

564 I had one particularly bad shift ... I remember getting up the next day ... and  
565 painting surfing waves ... and then there's this tiny little figure in a life jacket  
566 down at the bottom and that's me. It ended up that it really helped you know,  
567 because ... I'm OK, I will survive this so (Denise)

568

569 Similarly, Una expressed deep gratitude towards a child who had drawn a  
570 picture of a nurse superhero, and this struck a chord with her, giving her strength to  
571 keep going, “Thank you, our heroes, and I saw it and I just burst out crying like you  
572 know, that child, he doesn't know that, but...it did make a massive difference” (Una)

573

574 Another critical turning point was being able to reconcile with self:

575

576 I had feelings that the care delivered to the patients was sub optimal definitely,  
577 some of the time, not all of the time, and I had to reconcile that with myself with  
578 ‘I did my best, I did my very best’ (Ruth)

579  
580 A renewed meaning and purpose in their work and a strong sense of team spirit  
581 and pride was another turning point, “I’m proud of myself for going in and having put  
582 my shoulder to the wheel and, you know, pushed with the rest of my colleagues ... I  
583 didn't run away” (Una)

584  
585 Most of the nurses now felt more confident and vocal. For example, Emma’s  
586 expert knowledge made her feel “more confident and definitely more resilient”, with a  
587 strong desire to become a future nurse leader:

588  
589 Well as a nurse, I think I’ve found my voice: if there is a sign of deterioration or  
590 anything ... I feel more confident in myself. Definitely more confident in my  
591 ability and my experience and my knowledge (Emma)

592  
593 What was strong for all the nurses was the pride and gratitude they felt for the  
594 work they had done:

595  
596 I might have not done everything, but I was there for someone, and I've helped  
597 out, I have touched someone’s life. I was able to offer that service, and I feel so  
598 good about it myself, that I have chosen this profession (Claire)

599



600 All of the nurses began to take great comfort in ordinary things, such as  
601 returning to their families after feeling so isolated on the frontline. They also felt a deep  
602 sense of “appreciation” for just being alive and connected with nature:

603  
604 The sea is very calming, it's just like meditation, it's full of life, it's so positive,  
605 ... it's the simple things that I enjoy ..., baking in the kitchen, family and  
606 friends, a warm fire in the evening, a home cooked meal, barbecues in the  
607 garden, dogs, animals, cats (Una)

608  
609 The interviews for this study fostered new meaning and purpose for the nurses  
610 and helped them to make sense of their journeys. This brought about a renewed faith in  
611 peoples’ desire to help and listen to their stories, “You touched on every aspect of it and  
612 it's great, like, I feel this itself is a debriefing session ... just kind of talk about it and  
613 thank you, thank you for doing such a study” (Claire)

## 614 **Discussion**

615 Three key experiential themes were found that represented various stages of a  
616 journey taken by the nurses: first was the need to protect themselves emotionally and  
617 mentally from the intense psychological overwhelm they had experienced, having  
618 sacrificed themselves on the frontline; the second theme arose due to the nurses feeling  
619 isolated, and left out in a harsh pandemic climate for so long that they turned to each  
620 other for solidarity to bolster each other, and build self-esteem. What began to emerge  
621 was a sense of power in numbers which made the nurses stronger with each other and  
622 against the world; Finally, all of the nurses began to experience some critical turning  
623 points and growth.

## 624 **Protection of Sacrificial Self**

625           The current IPA study gives insight into how nurses emotionally and mentally  
626 protect themselves against the sacrificial commitment they made, and moral injury  
627 experienced, due to having to sacrifice their own high standards, while facing intense  
628 fear, psychological overwhelm, and prolonged existential threat posed by the pandemic.  
629 The sacrificial commitment stemmed in part from the nurse’s strong willingness to turn  
630 up every day, despite the unreasonable challenges and mandatory redeployment.  
631 Gaining insight into how the nurses protected themselves is important given that studies  
632 have found that nurses experience fear when at risk of contracting disease, thus  
633 impacting upon their emotional, physical and mental wellbeing as well as their capacity  
634 to do their job [15]. Some studies have found that the threat of death and dying creates a  
635 damaging heightened sense of alertness, and hypervigilance [16], and other studies  
636 report injury, and exposure because of upholding a strong moral, professional, and  
637 spiritual work ethic [17].

638           Some of the key ways the nurses protected themselves at work in the current  
639 study involved emotionally detaching, hunkering down, shielding themselves and  
640 making use of metaphors. Notably, some of them hunkered down to intentionally place  
641 themselves in a flow-type state, allowing them to focus on the present moment and  
642 distracting themselves from the surrounding chaos. This helped them to ‘hold it  
643 together’ and put their emotions on hold, so that they could continue to focus on the  
644 tasks at hand. Remarkably, only one study described a similar experience where ICU  
645 nurses were “pushing through long temporal episodes of work described as being in a  
646 “bubble” [44]. Theoretically, this study also contributes to the understanding of a  
647 hunkering down flow-type state, which may be an optimal state that can be achieved

648 when under pressure, thus, adding further insight into Csikszentmihalyi’s definition of  
649 flow, which requires one to enter an optimal psychological state [45].

650 Protection of self was strong with the nurses in the current study who shielded  
651 themselves from risk in various ways. For example, they engaged in positive self-talk  
652 and mindful mantras during work to be able to sustain and maintain their hunkering  
653 down type flow state. This fits with some literature which found that positive self-talk  
654 can increase work efficiencies whilst also reducing stress levels [46]. Also, the nurses in  
655 the current study shielded themselves from risk by detaching from work to recharge,  
656 getting enough rest, and staying in touch with family and friends. They also reduced  
657 their interactions with social media and news reports which is a common theme found  
658 in the nursing literature [21, 27].

659 Another interesting way to protect themselves emotionally was by use of  
660 metaphors in an effort to make sense of, and move forward from, the emotional trauma  
661 they experienced. The richness of the metaphorical language used by the nurses in the  
662 current study, was also evident in other nursing literature [18-20]. However, in contrast  
663 to the wider literature, the nurses in the current study also used metaphors to highlight  
664 positive emotions such as courageousness, fearlessness and pride.

## 665 **The Fortifying Effect of Us**

666 Another key experiential theme in this study was the fortifying effect they  
667 gained from being an “us” against “them”; them being the general public, politicians,  
668 and at times their own family, and senior managers. Nurses turned towards each other  
669 over time to look for back-up, and reassurance, when public opinion and support, had  
670 moved from being portrayed as heroes to waning support. Nurses found themselves  
671 mentally distancing themselves from the burden of the hero label in order to protect

672 themselves. The above findings are consistent with some studies [21, 44], where the  
673 hero status placed additional pressure on nurses to work even harder.

674         Also, the nurses turned to each other, to find strength and support as they often  
675 felt alone and isolated from their own family members, who didn't understand the  
676 distressing nature of their experiences with death and suffering. Although the nurses felt  
677 they were weathering the same storm, they were not in the same boat. Not surprisingly  
678 this was broadly consistent with the wider literature, such as where nurses found it hard  
679 to relate their feelings and experiences to their families as they just didn't understand  
680 what they were going through [30].

681         Another strengthening of a sense of us came as they felt solidarity together as a  
682 group who were experiencing strong feelings of exploitation and abandonment at work.  
683 They felt excluded from important decisions, and most were redeployed without choice,  
684 irrespective of their qualifications, personal strengths, and experiences. Unfairness was  
685 also felt, because some nursing colleagues were never once called upon by management  
686 for redeployment. This created resentment and unnecessary strain on relationships  
687 between the nurses (us), and some of their colleagues (them), as well as between nurses  
688 and senior hospital managers. This fits with what Billings found among redeployed  
689 staff, including nurses, who held resentment against others who were perceived to be  
690 doing less work [27]. Furthermore, as a collective, some of the nurses started to  
691 question why they ever chose nursing as a career and some contemplated leaving the  
692 profession altogether.

693         What emerged from the above findings were feelings of isolation, aloneness and  
694 largely feeling unsupported in a challenging landscape. Over time, the nurses began to  
695 build alliances with each other (“us”) at a time when they needed to bolster their self-  
696 esteem and build resilience against ‘them’ and the world. This helped re-establish the

697 self-esteem for which nurses were accustomed in their roles, and it gave them a renewed  
698 sense of hope at a time when huge commitment was required from them. This solidarity  
699 fits well with another study [44] which reiterates the importance of supporting one  
700 another to help cope with the situation.

701 At times other staff felt part of this collective ‘us’, such as the frontline clinical  
702 nurse managers (CNMs), who at times brought further support. This helped build some  
703 inspiration and enthusiasm on the ground and can be seen in the wider literature where  
704 stronger collaboration on the ground helped improve nurse wellbeing [44]. This fits  
705 with the findings in one thematic study [47], where nurses experienced a stronger sense  
706 of ‘them and us’ with senior managers, where a lack of their presence and support was  
707 felt.

## 708 **Critical Turning Points and Growth**

709 The third experiential theme was that the nurse experienced critical turning  
710 points and growth as they waded through the emotional turbulence of working during  
711 the pandemic. It has been strongly suggested that when nurses fail to do for their  
712 patients what they know deep down is good for them, their own moral integrity is at  
713 risk, and they end up with moral injury [48]. Not being able to alleviate pain and  
714 suffering or provide and care for critically ill patients during COVID has been a  
715 prevailing feeling among nurses in the current study, and moving beyond this phase was  
716 critical to their survival.

717 Key critical turning points for the nurses in this study included when they were  
718 able to step back and accept their feelings; enabling them to feel more hopeful or better  
719 able to cope, and being able to reconcile, or find purpose and meaning for themselves.  
720 This is widely consistent with older psychological constructs such as finding benefit

721 [49] and enabling growth [21]. In the same way that grief and recovery do not follow an  
722 orderly process [50], the nurses began experiencing pivots and positive changes thus  
723 allowing them to regain some sense of self control in their lives. For example, Ruth  
724 recalled special moments with her patients in their last days before death and Una was  
725 deeply moved as she felt valued and a sense of pride after recalled children's drawing of  
726 nurses in capes. Both examples show the importance of emotional connectedness with  
727 nurse and patient. Empirical research has long identified emotional connectedness as a  
728 key coping resource for nurses [51].

729         Nurses in the current study conveyed a strong sense of duty toward their patients  
730 arising from a deep sense of needing to care [19, 20]. This permitted them to feel  
731 immensely proud of themselves, and gave them a sense of purpose and meaning in their  
732 lives [8]. This was echoed widely in the literature where nurses were reported to having  
733 felt strengthened through adversity thus impacting positively upon patients' lives [52].  
734 Moreover, Claire was able to rekindle her strong passion for nursing having lost it  
735 during her time on the front line. Harmonious passion is known to contribute to  
736 sustained psychological well-being, thus preventing negative affect [53], and the strong  
737 positive effect of believing in a higher power in times of crisis [29], may have  
738 contributed to Claire's growth. Some of the nurses said they now felt more expert in  
739 their roles. They felt listened to and respected, particularly by their medical colleagues,  
740 and this meant a lot as they felt more empowered to voice their opinions. This is  
741 consistent across the wider literature where the new roles nurses assumed during the  
742 pandemic provided significant reward [8].

743         The meaning of life is a fundamental factor of human existence, relating to the  
744 enormous existential power a person has to face in everyday challenges [54]. Denise  
745 expressed herself through art, Una and Emma made a grounding connection with nature

746 and the outdoors. Others simply experienced a deep sense of gratitude and appreciation  
747 for getting through this and for life itself.

748         In terms of future research, it will be important in the coming years to track  
749 frontline nurses over time to see how they become resilient and overcome negative  
750 psychological effects or burnout. Future research could explore nurses spirituality to see  
751 if it extends their sacrificial duty, and to see if this better enables them to cope. In terms  
752 of positive organisational scholarship, it would also be interesting to know more about  
753 how nurses can purposefully enter a flow state or excelling zone, to enable them to  
754 detach and focus on the present moment to enhance their role. It may also be important  
755 to explore if future crises would merit redeploying nurses to areas that align with their  
756 core strengths and professional experience before being redeployed. Finally, given how  
757 cleverly nurses used time, space, and the extensive use of metaphors, a study examining  
758 the benefits of metaphor coaching for frontline nurses may be useful.

## 759 **Strengths and weaknesses**

760         It could be argued that there are similar studies in the literature [55-58],  
761 however, those studies used more conventional approaches such as content analysis and  
762 thematic analysis, producing more generalised findings, and not interpretative  
763 phenomenological analysis, which involves a much closer examination of the  
764 experiences and meaning of the subject matter.

765         Moreover, one of the main strengths of this study was its capacity to give voice  
766 to frontline nurses who worked in Irish hospitals during the pandemic, whereas most of  
767 the studies outlined above took place in other countries. At the time of writing, this  
768 study was the first to examine the thoughts, feelings, perceptions and resilience of  
769 nurses working on the frontline, through an interpretative phenomenological lense.  
770 Another key strength is that the researchers have suggested a more streamlined

771 definition for ‘nurse sacrificial commitment’. One of the most powerful findings was  
772 how the nurses purposefully entering into a flow-type state or excelling zone to detach  
773 from the surrounding chaos, which may enhance our knowledge on the psychological  
774 concept of “flow” in nurses during crisis.

775         One limitation with this study was that findings were drawn from six  
776 participants (n = 6) living and working in two provinces in Ireland. Although this  
777 offers a rich perspective from an Irish context, the researcher would have valued a  
778 wider scope of study participants but was unable to do so due to the  
779 overwhelming working conditions and time constraints on the nurses during the  
780 main COVID surge in 2021.

781         Another limitation was that male nurses working on COVID wards were  
782 not included in this study. Future research might include research on male nurses,  
783 or indeed a study comparing the effects of the pandemic on both female and male  
784 nurses. Some would argue that collecting qualitative data online can lead to  
785 limitations, however this was not our experience. In fact, participants reported that  
786 the online interviews were far more favourable than in-person interviews given  
787 the pandemic circumstances, and they felt much more at ease and protected from  
788 potential infection. All of the nurses valued deeply the online interviews as they  
789 felt they were the only meaningful form of support and debriefing they had  
790 received.

## 791 **Conclusion**

792         Each of the nurses provided their own journeys about how they protected  
793 themselves given the sacrifices they were making, whilst moving to a collective sense  
794 of us, to gain back strength and resilience, and over time how they experienced critical



795 turning points and growth. The analysis has given a deeper insight into the journey the  
796 nurses took to overcome the adversity they experienced in the Irish healthcare system.  
797 Moreover, they also learned to protect themselves, to bring balance to the sacrificial  
798 commitment they made as frontline staff, and to turn towards each other, creating  
799 solidarity, or an ‘us’, as well as bringing support, and building self-belief, which led to  
800 some critical turning points and growth.

801         The study also exhibits how strongly the nurses engaged in various self-coping  
802 strategies, most notably by the extraordinary use of metaphors to “grasp the meaning of  
803 highly burdensome experiences” [48], but also, by adapting daily work practices by  
804 purposefully entering into a flow-like state or excelling zone to detach from the  
805 surrounding chaos.

806         Provision of supports for nurses, and indeed all healthcare workers, must be  
807 ongoing both during and well after crisis events. Although there was strong evidence of  
808 peer-to-peer support, and support provided by a small number of frontline clinical nurse  
809 managers, none of the nurses in the current study had received any meaningful  
810 psychological supports from their organisations either during or in the immediate  
811 aftermath of the pandemic, despite their enormous sacrifice. Four years on, nurses in  
812 Ireland are still experiencing deeply, the negative mental health and wellbeing impacts  
813 of the COVID-19 pandemic. We must now direct our efforts towards how nursing  
814 professionals will be able to care for their patients, as well as being cared for themselves  
815 [59] as we face the next crisis which is looming on the horizon.

816  
817  
818  
819

## 820 **Acknowledgements**

821 To my six participants, you gave up so much to care for your patients and you  
822 became their family in their time of need. Thank you sincerely for your  
823 unrelenting sacrifice, and for your part in this research paper. Your stories have  
824 now been heard. Thank you also to my co-author and supervisor, Dr Anna Trace,  
825 for her support and guidance throughout the entire project.

## 826 **Copyright / Creative Commons**

827 This is an open access article distributed under the terms of the [Creative Commons](https://creativecommons.org/licenses/by/4.0/)  
828 [Attribution 4.0 International](https://creativecommons.org/licenses/by/4.0/), which permits unrestricted use, distribution, and  
829 reproduction in any medium, provided the original author and source are credited.

## 830 **Data Availability Statement**

831 All data can be shared publicly apart from anonymised individual interview transcripts  
832 because ethically there is a risk that this would compromise participant anonymity and  
833 confidentiality. Raw format (verbatim transcripts) contains both potentially identifying  
834 and sensitive participant information (e.g., detailed discussions, mental health  
835 challenges, and potential participant geographical locations). However, cleaned data  
836 (semi-structured interview guide, sample IPA colour-coded theme generation table,  
837 copy of the consolidated criteria for reporting qualitative research (COREQ), copy of  
838 critical appraisal skills programme (CASP) checklist, can be accessed at  
839 <https://zenodo.org/records/14174070> for this research article.

840 Data are available from School of Applied Psychology Research Ethics Committee  
841 (APREC), at University College Cork (contact via [ethics.ap@ucc.ie](mailto:ethics.ap@ucc.ie)) for researchers  
842 who meet the criteria for access to confidential data.

843 **Citation:** Creedon S, Anna T. From protection of sacrificial self to critical turning

844 points and growth: Nurses' experiences on the frontline during the COVID-19  
845 pandemic. Zenodo; 2024.

## 846 **References**

847

- 848 1. Guo YF, Luo YH, Lam L, Cross W, Plummer V, Zhang JP. Burnout and its  
849 association with resilience in nurses: A cross-sectional study. *J Clin Nurs*. 2018  
850 Jan; 27(1-2):441-449. <https://doi.org/10.1111/jocn.13952>
- 851 2. Tahghighi M, Rees CS, Brown JA, Breen LJ, Hegney D. What is the impact of  
852 shift work on the psychological functioning and resilience of nurses? An  
853 integrative review. *J Adv Nurs*. 2017 Sep; 73(9):2065-2083.  
854 <https://doi.org/10.1111/jan.13283>
- 855 3. Johnson S, Dalton-Locke C, Vera San Juan N, Foye U, Oram S, Papamichail A,  
856 et al; COVID-19 Mental Health Policy Research Unit Group. Impact on mental  
857 health care and on mental health service users of the COVID-19 pandemic: a  
858 mixed methods survey of UK mental health care staff. *Soc Psychiatry Psychiatr  
859 Epidemiol*. 2021 Jan; 56(1):25-37. <https://doi.org/10.1007/s00127-020-01927-4>
- 860 4. Moya-Salazar J, Goicochea-Palomino EA, Porrás-Guillermo J, Cañari B, Jaime-  
861 Quispe A, Zuñiga N, et al. Assessing empathy in healthcare services: a  
862 systematic review of South American healthcare workers' and patients'  
863 perceptions. *Front Psychiatry*. 2023 Nov 24; 14:1249620.  
864 <https://doi.org/10.3389/fpsy.2023.1249620>
- 865 5. Ní Léime Á, O'Neill M. The Impact of the COVID-19 Pandemic on the  
866 Working Lives and Retirement Timing of Older Nurses in Ireland. *Int J Environ*

- 867 Res Public Health. 2021 Sep 24; 18(19):10060.  
868 <https://doi.org/10.3390/ijerph181910060>
- 869 6. Ulupınar F, Erden Y. Intention to leave among nurses during the COVID-19  
870 outbreak: A rapid systematic review and Meta-Analysis. J Clin Nurs. 2024 Jan;  
871 33(1):393-403. <https://doi.org/10.1111/jocn.16588>
- 872 7. Regenold N, Vindrola-Padros C. Gender Matters: A Gender Analysis of  
873 Healthcare Workers' Experiences during the First COVID-19 Pandemic Peak in  
874 England. Soc. Sci. 2021; 10(2):43. <https://doi.org/10.3390/socsci10020043>
- 875 8. Sumner RC, Kinsella EL. Grace Under Pressure: Resilience, Burnout, and  
876 Wellbeing in Frontline Workers in the United Kingdom and Republic of Ireland  
877 During the SARS-CoV-2 Pandemic. Front Psychol. 2021 Jan 27; 11:576229.  
878 <https://doi.org/10.3389/fpsyg.2020.576229>
- 879 9. Kennedy E, Kennedy P, Hernandez J, Shakoor K, Munyan K. Understanding  
880 Redeployment During the COVID-19 Pandemic: A Qualitative Analysis of  
881 Nurse Reported Experiences. SAGE Open Nurs. 2022 Jul 21;  
882 8:23779608221114985. <https://doi.org/10.1177/23779608221114985>
- 883 10. Kisely S, Warren N, McMahon L, Dalais C, Henry I, Siskind D. Occurrence,  
884 prevention, and management of the psychological effects of emerging virus  
885 outbreaks on healthcare workers: rapid review and meta-analysis. BMJ. 2020  
886 May 5; 369:m1642. <https://doi.org/10.1136/bmj.m1642>
- 887 11. Silva, MCN, Machado MH. Health and Work System: challenges for the  
888 Nursing in Brazil. Ciênc. Collective Health. 2020 Jan; 25(1):7-13.  
889 <https://doi.org/10.1590/1413-81232020251.27572019>

- 890 12. Su Z, Cheshmehzangi A, McDonnell D, Šegalo S, Ahmad J, Bennett B. Gender  
891 inequality and health disparity amid COVID-19. *Nurs Outlook*. 2022 Jan-Feb;  
892 70(1):89-95. <https://doi.org/10.1016/j.outlook.2021.08.004> PMID: 34774306.
- 893 13. Women in Global Health. Policy Brief: The State of Women and Leadership in  
894 Global Health: The XX Paradox. *Women in Global Health*; 2023.
- 895 14. Nursing and Midwifery Board of Ireland: State of the Register 2023
- 896 15. Maben J, Bridges J. Covid-19: Supporting nurses' psychological and mental  
897 health. *J Clin Nurs*. 2020; 29(15-16):2742-50.  
898 <https://doi.org/10.1111/jocn.15307>
- 899 16. McGlinchey E, Hitch C, Butter S, McCaughey L, Berry E, Armour C.  
900 Understanding the lived experiences of healthcare professionals during the  
901 COVID-19 pandemic: an interpretative phenomenological analysis. *Eur J*  
902 *Psychotraumatol*. 2021 Apr 30; 12(1):1904700.  
903 <https://doi.org/10.1080/20008198.2021.1904700>
- 904 17. Galehdar N, Kamran A, Toulabi T, Heydari H. Exploring nurses' experiences of  
905 psychological distress during care of patients with COVID-19: a qualitative  
906 study. *BMC Psychiatry*. 2020 Oct 6; 20(1):489. doi: 10.1186/s12888-020-  
907 02898-1. <https://doi.org/10.1186/s12888-020-02898-1>
- 908 18. Durgun H, Köktürk Dalcalı B, Bayraktar F. Mental images of nurses regarding  
909 COVID-19: A metaphor study. *J Nurs Manag*. 2022 Jan; 30(1):53-61.  
910 <https://doi.org/10.1111/jonm.13482>
- 911 19. Lee JY, Hong JH, Park EY. Beyond the fear: Nurses' experiences caring for  
912 patients with Middle East respiratory syndrome: A phenomenological study. *J*  
913 *Clin Nurs*. 2020 Sep; 29(17-18):3349-3362. <https://doi.org/10.1111/jocn.15366>

- 914 20. Liu, Q., Luo, D., Haase, J. E., Guo, Q., Wang, X. Q., Liu, S., et al (2020). The  
915 experiences of health-care providers during the COVID-19 crisis in China: a  
916 qualitative study. *The Lancet Global Health*, 8(6), e790–e798.  
917 [https://doi.org/10.1016/S2214-109X\(20\)30204-7](https://doi.org/10.1016/S2214-109X(20)30204-7)
- 918 21. Kinsella EL, Hughes S, Lemon S, Stonebridge N, Sumner RC. "We shouldn't  
919 waste a good crisis": the lived experience of working on the frontline through  
920 the first surge (and beyond) of COVID-19 in the UK and Ireland. *Psychol*  
921 *Health*. 2022 Feb; 37(2):151-177.  
922 <https://doi.org/10.1080/08870446.2021.1928668>
- 923 22. Rosen A, Cahill JM, Dugdale LS. Moral Injury in Health Care: Identification  
924 and Repair in the COVID-19 Era. *J Gen Intern Med*. 2022 Nov; 37(14):3739-  
925 3743. doi: 10.1007/s11606-022-07761-5. [https://doi.org/10.1007/s11606-022-](https://doi.org/10.1007/s11606-022-07761-5)  
926 [07761-5](https://doi.org/10.1007/s11606-022-07761-5)
- 927 23. Rosser E, Westcott L, Ali PA, Bosanquet J, Castro-Sanchez E, Dewing J, et al.  
928 The Need for Visible Nursing Leadership During COVID-19. *J Nurs Scholarsh*.  
929 2020 Sep; 52(5):459-461. <https://doi.org/10.1111/jnu.12587>
- 930 24. Brown L, Haines S, Amonoo HL, Jones C, Woods J, Huffman JC, et al. Sources  
931 of Resilience in Frontline Health Professionals during COVID-19. *Healthcare*  
932 (Basel). 2021 Dec 8; 9(12):1699. <https://doi.org/10.3390/healthcare9121699>
- 933 25. Dekel S, Ein-Dor T, Solomon Z. Posttraumatic growth and posttraumatic  
934 distress: A longitudinal study. *Psychological Trauma: Theory, Research,*  
935 *Practice, and Policy*. 2012; 4(1):94. <https://doi.org/10.1037/a0021865>
- 936 26. Maslow AH. A theory of human motivation. *Psychol Rev* 1943 07; 50(4):370-  
937 396. <https://doi.org/10.1037/h0054346>

- 938 27. Billings J, Abou Seif N, Hegarty S, Ondruskova T, Soulios E, Bloomfield M,  
939 Greene T. What support do frontline workers want? A qualitative study of health  
940 and social care workers' experiences and views of psychosocial support during  
941 the COVID-19 pandemic. PLoS One. 2021 Sep 2; 16(9):e0256454.  
942 <https://doi.org/10.1371/journal.pone.0256454>
- 943 28. Hawthorne DM, Barry CD. Nurses' Use of Spiritual Practices in Caring for Self  
944 During the Pandemic. Holist Nurs Pract. 2021 Sep-Oct 01; 35(5):242-247.  
945 <https://doi.org/10.1097/HNP.0000000000000467>
- 946 29. Koenig HG. Religion, spirituality, and health: the research and clinical  
947 implications. ISRN Psychiatry. 2012 Dec 16; 2012:278730.  
948 <https://doi.org/10.5402/2012/278730>
- 949 30. Sahay S, Wei W, “Everything Is Changing, but I Am Not Alone”: Nurses’  
950 Perceptions of Social Support during COVID-19. Sustainability 2022, 14(6),  
951 3262. <https://doi.org/10.3390/su14063262>
- 952 31. Akhanemhe R, Wallbank S, Greenberg N. An evaluation of REACTMH mental  
953 health training for healthcare supervisors. Occup Med (Lond). 2021 Jun 16;  
954 71(3):127-130. Erratum in: Occup Med (Lond). 2021 Oct 1; 71(6-7):309.  
955 <https://doi.org/10.1093/occmed/kqab023>
- 956 32. Greenberg N, Docherty M, Gnanapragasam S, Wessely S. Managing mental  
957 health challenges faced by healthcare workers during covid-19 pandemic. BMJ.  
958 2020 Mar 26; 368:m1211. <https://doi.org/10.1136/bmj.m1211>
- 959 33. White JH. "It Was Never Enough": The Meaning of Nurses' Experiences Caring  
960 for Patients during the COVID-19 Pandemic. Issues Ment Health Nurs. 2021  
961 Dec; 42(12):1084-1094. <https://doi.org/10.1080/01612840.2021.1931586>

- 962 34. Greenberg N, Tracy D. What healthcare leaders need to do to protect the  
963 psychological well-being of frontline staff in the COVID-19 pandemic. *BMJ*  
964 *Lead*. 2020 Sep 28; 4(3):101-102. <https://doi.org/10.1136/leader-2020-000273>
- 965 35. Martín-Del-Río B, Neipp MC, García-Selva A, Solanes-Puchol A. Positive  
966 Organizational Psychology: A Bibliometric Review and Science Mapping  
967 Analysis. *Int J Environ Res Public Health*. 2021 May 14; 18(10):5222.  
968 <https://doi.org/10.3390/ijerph18105222>
- 969 36. van Zyl LE, Dik BJ, Donaldson SI, Klibert JJ, di Blasi Z, van Wingerden J, et al.  
970 Positive organisational psychology 2.0: embracing the technological revolution.  
971 *J Posit Psychol*. 2023;1–13. <https://doi.org/10.1080/17439760.2023.2257640>.
- 972 37. Pietkiewicz, Igor Jacob and Jonathan A. Smith. “A practical guide to using  
973 Interpretative Phenomenological Analysis in qualitative research psychology.”  
974 (2014).
- 975 38. Palinkas LA, Horwitz SM, Green CA, Wisdom JP, Duan N, Hoagwood K.  
976 Purposeful Sampling for Qualitative Data Collection and Analysis in Mixed  
977 Method Implementation Research. *Adm Policy Ment Health*. 2015 Sep;  
978 42(5):533-44. <https://doi.org/10.1007/s10488-013-0528-y>
- 979 39. Reid K, Flowers P, Larkin M. Exploring lived experience. *The Psychologist*, 18  
980 (1), 20–23. Link: <https://goo.gl/9ScDxi> . 2005.
- 981 40. Smith JA, Flowers P, Larkin M. *Interpretative Phenomenological Analysis:*  
982 *Theory, Method and Research*. London; Los Angeles;: SAGE; 2009.
- 983 41. Ceri V, Cicek I. Psychological Well-Being, Depression and Stress During  
984 COVID-19 Pandemic in Turkey: A Comparative Study of Healthcare  
985 Professionals and Non-Healthcare Professionals. *Psychol Health Med*. 2021 Jan;  
986 26(1):85-97. <https://doi.org/10.1080/13548506.2020.1859566>



- 987 42. Smith JA, Eatough V. Analysing qualitative data in psychology. Interpretative  
988 phenomenological analysis. 2007: 35-50.
- 989 43. Bradbury-Jones C. Enhancing rigour in qualitative health research: exploring  
990 subjectivity through Peshkin's I's. J Adv Nurs. 2007 Aug; 59(3):290-8.  
991 <https://doi.org/10.1111/j.1365-2648.2007.04306.x>
- 992 44. Slettmyr A, Arman M, Andermo S, Malmberg C, Hällström Å, Hugelius K, et  
993 al. Intensive care nurses' lived experience of altruism and sacrifices during the  
994 Covid-19 pandemic: A phenomenological study. J Adv Nurs. 2023 Jan;  
995 79(1):244-253. doi: 10.1111/jan.15467. <https://doi.org/10.1111/jan.15467>
- 996 45. Csikszentmihalyi M, Csikszentmihalyi M. Play and intrinsic rewards. Flow and  
997 the foundations of positive psychology: The collected works of Mihaly  
998 Csikszentmihalyi. 2014: 135-53.
- 999 46. Olyaie Khachic Roghayeh, Bozorgnejad Mehri, Haghani Shima, Khayeri  
1000 Fereydoon, Seyedfatemi Naiemeh. Evaluating the Effect of Positive Self-Talk  
1001 on Job Stress among Nurses Working in the Emergency Wards. IJN 2020;  
1002 33(127 ):89-102. <https://sid.ir/paper/398998/en>
- 1003 47. Baldwin S, George J. Qualitative study of UK health professionals' experiences  
1004 of working at the point of care during the COVID-19 pandemic. BMJ Open.  
1005 2021 Sep 6; 11(9):e054377. <https://doi.org/10.1136/bmjopen-2021-054377>.
- 1006 48. Arman M, Hammarqvist AS, Rehnsfeldt A. Burnout as an existential deficiency-  
1007 -lived experiences of burnout sufferers. Scand J Caring Sci. 2011 Jun;  
1008 25(2):294-302. <https://doi.org/10.1111/j.1471-6712.2010.00825.x>.
- 1009 49. Helgeson VS, Reynolds KA, Tomich PL. A meta-analytic review of benefit  
1010 finding and growth. J Consult Clin Psychol. 2006 Oct; 74(5):797-816.  
1011 <https://doi.org/10.1037/0022-006X.74.5.797>.

- 1012 50. Kubler-Ross, E., & Kessler, D. (2005). On grief and grieving. New York:  
1013 Scribner.
- 1014 51. Bender AE, Berg KA, Miller EK, Evans KE, Holmes MR. "Making Sure We  
1015 Are All Okay": Healthcare Workers' Strategies for Emotional Connectedness  
1016 During the COVID-19 Pandemic. Clin Soc Work J. 2021; 49(4):445-455.  
1017 <https://doi.org/10.1007/s10615-020-00781-w>
- 1018 52. Deliktas Demirci A, Oruc M, Kabukcuoglu K. 'It was difficult, but our struggle  
1019 to touch lives gave us strength': The experience of nurses working on COVID-  
1020 19 wards. J Clin Nurs. 2021 Mar; 30(5-6):732-741.  
1021 <https://doi.org/10.1111/jocn.15602>
- 1022 53. Vallerand RJ, Blanchard C, Mageau GA, Koestner R, Ratelle C, Leonard M, et  
1023 al. Les passions de l'ame: on obsessive and harmonious passion. J Pers Soc  
1024 Psychol. 2003 Oct; 85(4):756-67. <https://doi.org/10.1186/2211-1522-2-1>
- 1025 54. Nowicki GJ, Ślusarska B, Tucholska K, Naylor K, Chrzan-Rodak A, Niedorys  
1026 B. The Severity of Traumatic Stress Associated with COVID-19 Pandemic,  
1027 Perception of Support, Sense of Security, and Sense of Meaning in Life among  
1028 Nurses: Research Protocol and Preliminary Results from Poland. Int J Environ  
1029 Res Public Health. 2020 Sep 7; 17(18):6491.  
1030 <https://doi.org/10.3390/ijerph17186491>
- 1031 55. Ashley C, James S, Williams A, Calma K, Mcinnes S, Mursa R, et al. The  
1032 psychological well-being of primary healthcare nurses during COVID-19: A  
1033 qualitative study. J Adv Nurs. 2021 Sep; 77(9):3820-3828.  
1034 <https://doi.org/10.1111/jan.14937>.
- 1035 56. Credland N, Griffin M, Hamilton P, Harness O, McMurray R. The impact of  
1036 COVID-19 on mental health and well-being in critical care nurses - a

- 1037 longitudinal, qualitative study. Nurs Crit Care. 2024 Jan; 29(1):32-39.
- 1038 <https://doi.org/10.1111/nicc.12930>.
- 1039 57. Dehghani A, Makaremnia S, Rahmanian A. Exploring Psychological
- 1040 Consequences of COVID-19 Pandemic on Nurses Caring Patients with COVID-
- 1041 19: A Qualitative Study. J Caring Sci. 2023 Oct 10; 12(4):255-260.
- 1042 <https://doi.org/10.34172/jcs.2023.31779>.
- 1043 58. Peng X, Yang Y, Gao P, Ren Y, Hu D, He Q. Negative and positive
- 1044 psychological experience of frontline nurses in combatting COVID-19: A
- 1045 qualitative study. J Nurs Manag. 2022 Oct; 30(7):2185-2193.
- 1046 <https://doi.org/10.1111/jonm.13481>.
- 1047 59. Gómez-Salgado J, Navarro-Abal Y, López-López MJ, Romero-Martín M,
- 1048 Climent-Rodríguez JA. Engagement, Passion and Meaning of Work as
- 1049 Modulating Variables in Nursing: A Theoretical Analysis. Int J Environ Res
- 1050 Public Health. 2019 Jan 3; 16(1):108. <https://doi.org/10.3390/ijerph16010108>
- 1051
- 1052
- 1053
- 1054
- 1055
- 1056
- 1057
- 1058

1059 **Supporting Information**

1060 **S1 Table. Participant characteristics**

1061 **S2 Table. Summary table superordinate, subordinate and sub-themes &**

1062 **quotations**

1063 **S1 Fig. Thematic map illustrating three major themes and subtheme**

1064

1065

1066

1067

1068

1069

1070

1071

1072

1073

1074

1075

1076

1077

1078

1079





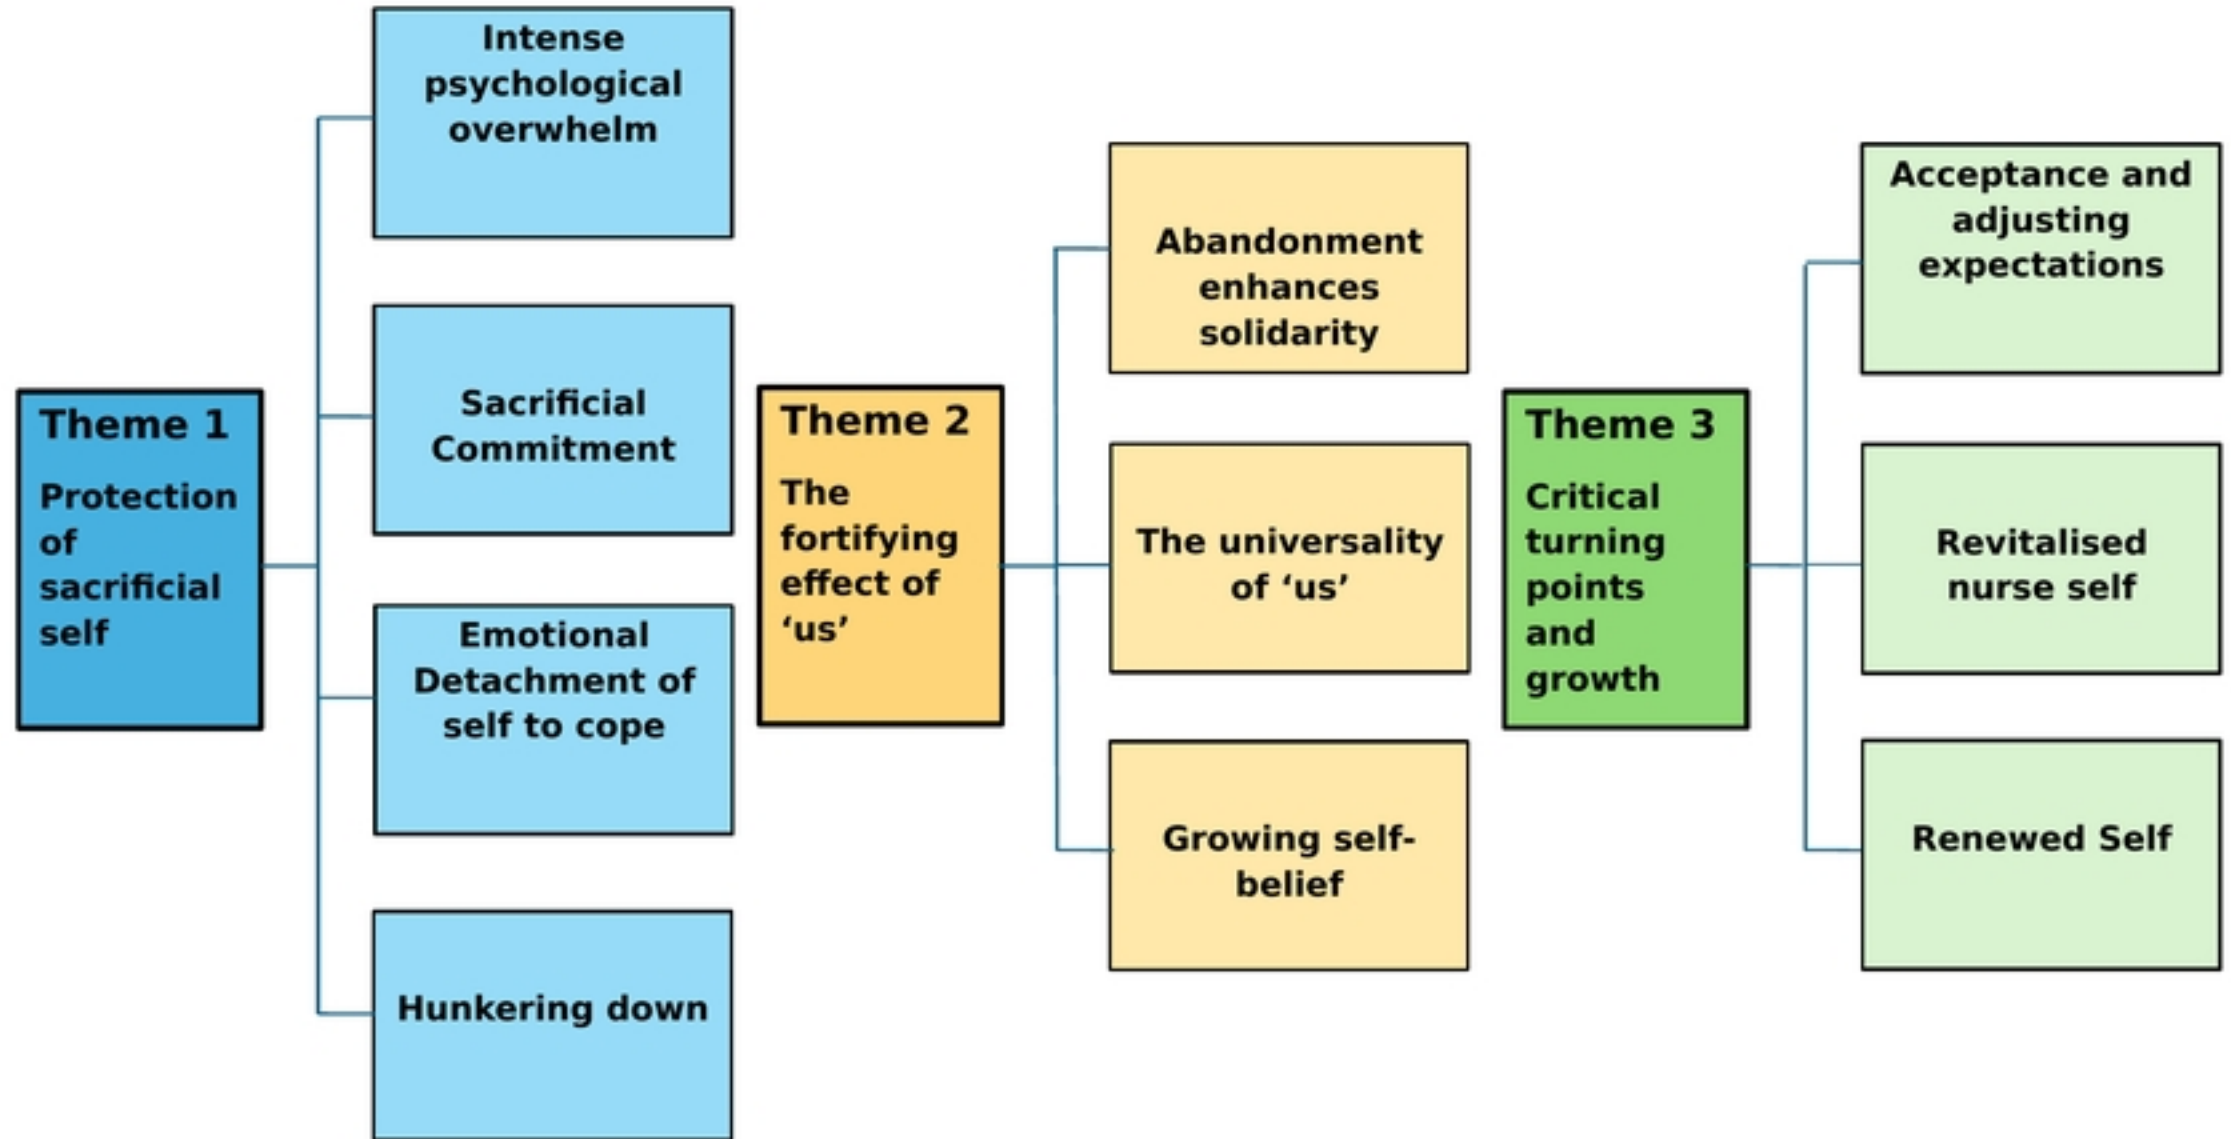

S1 Fig. Thematic map illustrating three major themes and subthe
